# Supplementary material for: Phylogenetic position of a whale-fall lancelet (Cephalochordata) inferred from whole mitochondrial genome sequences
Source: PubMed Central journal article supplement (PMC2034537; doi:10.1186/1471-2148-7-127), 2007-07-31
Supplement: 1471-2148-7-127-S1.pdf [file 1471-2148-7-127-S1.pdf]

## Additional File 1

### The list of primers used in the PCR and sequencing for all species of the genus *Asymmetron*

| L primers                                                        | Sequence (5' → 3')                  | Ref. | H primers         | Sequence (5' → 3')                | Ref. |
|------------------------------------------------------------------|-------------------------------------|------|-------------------|-----------------------------------|------|
| <i>Long PCR primers (A. inferum-specific primer)</i>             |                                     |      |                   |                                   |      |
| Asin-LA-cox1-L                                                   | GCGGGCAAGCATCGAATGAAATCGTGTTC       |      | Asif-LA-rrnLH     | GGACAAGTGATTATGCTACCTTTGCACAGTC   |      |
| <i>Long PCR primers (A. lucayanum-specific primer)</i>           |                                     |      |                   |                                   |      |
|                                                                  |                                     |      | AlH6890-COI (981) | GGCGTTTCTCATTTAATCTGCTTAGATCCT    | a    |
| <i>Long PCR primers (lancelet-versatile primers)</i>             |                                     |      |                   |                                   |      |
| AmphLAL1076-cox1                                                 | CTGTAGGTGGGTTAACAGGAATTGTATTAGC     | a    | AmphLAH916-cox1   | CCTGTTGGTACAGCAATTACTATAAGTAGCAGC | a    |
| AmphLAL11947-rrnL                                                | GACTGTGCAAAGGTAGCATAATCACTTGCCC     | a    | AmphLAH12317-rrnL | CTAGGAATCTTGATCCAACATCGAGGTCCG    | a    |
| <i>Long PCR primers (fish-versatile primers)</i>                 |                                     |      |                   |                                   |      |
| S-LA-16SL (12411)                                                | CGATTAAAGTCCTACGTGATCTGAGTTCAG      | b    |                   |                                   |      |
| <i>PCR and sequencing primers (A. inferum-specific primer)</i>   |                                     |      |                   |                                   |      |
| Asin-cox1-L1                                                     | TTCTTTGGTCACCCAGAGGT                |      | Asin-cox2-H       | TCGGTATATTCATAGCTTCAG             |      |
| Asin-atp6-L                                                      | ACGCAATGCTTCTCTCTTAG                |      | Asin-nad4L-H1     | GAGTGCTAAACCTGAACTGG              |      |
| Asin-nad4-L1                                                     | ACCTTTGAGGCCCTATAAAC                |      | Asin-nad4-H       | GTCTACTTGTAAGTCAAGCGG             |      |
| Asin-nad4-L2                                                     | ATTCTACACTTAACACCAGC                |      | Asin-trnH-H       | TGCCATTGGGATTAATAAA               |      |
| Asin-nad5-L1                                                     | AGACAAATAGTAACACGTCAC               |      | Asin-nad6-H       | CGGGTAGAGCTGTTTTGTAA              |      |
| Asin-nad5-L2                                                     | TTTAGGGGTCATAAAAGCAA                |      | Asin-cob-H        | AATGTACAATAGCTAGTCCTG             |      |
|                                                                  |                                     |      | Asin-nad2-H       | TGCTCCGATTGATTGATTGAG             |      |
| <i>PCR and sequencing primers (A. lucayanum-specific primer)</i> |                                     |      |                   |                                   |      |
| Aslu(spA)-nad5-L                                                 | TGTTCAATTTTGCAAGCCATG               |      | AlH6012-COI (109) | GGCTGGGATAGTTCTGCWCGAAT           | a    |
| El-L6744-nad6                                                    | TTCGATCTCTATGAGCGCGG                | a    | El-H7103-nad6     | GATTCTGCCTCTAATGTGGC              | a    |
| El-L6994-nad6                                                    | TAAAGACGTTTGCGCTTGAG                | a    | Aslu(spA)-nad5-H  | AGAGATGCAAATACTGCGGC              |      |
|                                                                  |                                     |      | El-H8317-nad5     | ATACTAATTCTAGTCAGCGC              | a    |
| <i>PCR and sequencing primers (lancelet-versatile primers)</i>   |                                     |      |                   |                                   |      |
| AmphL1325-cox1                                                   | GGNATACCWCGNCGRTATTCNGA             | a    | AmphH131-cox1     | GGCTGNGANARTTCNGCNCGAAT           |      |
| AmphL1573-trnS                                                   | GTCTATTGGTTTCAAGCC                  | a    | AmphH1580-trnS    | TATGCGATTGGCTTGAAACC              | a    |
| AmphL2429-trnK                                                   | GCGTTAACCTTTTAAGTTAATGATGAG         | a    | AmphH2005-cox2    | TCTGTRTAYTCRTARCTTCA              | a    |
| AmphL3328-cox3                                                   | CAYCCRTGRCAYT TAGTDGARCC            | a    | AmphH2403-trnK    | CTCATCATTAACCTAAAAGGTTAACGC       | a    |
| AmphL4471-trnR                                                   | ATTTGGTTTCGGCCANAAG                 | a    | AmphH4049-cox3    | CCTCACCAGTAAATACAWACG             | a    |
| AmphL5013-nad4                                                   | CCTTTGATATTAATTGCTAGHCAAC           | a    | AmphH4452-trnR    | CTTNTGGGCCGAAACCAAAT              | a    |
| AmphLAL5212-nad4                                                 | GGAGCACAAAAAGAGCGTTATCAAGCAGGAACATA | a    | AmphH4989-nad4    | GTTGGCTAGCAATTAATATYAAAGG         | a    |
| AmphL5429-nad4                                                   | GGCTGCCTAAGGCTCAYGTDGAG             | a    | AmphH5407-nad4    | CTCCACGTGTGCCTTWGGMARCC           | a    |
| AmphL6166-trnH                                                   | CTAGTTTAATWAGAATWCTAAGTTGTGGTC      | a    | AmphH6137-trnH    | GACCACAACCTTAGWATTCTWATTAACCTAG   | a    |

|                                                            |                                   |   |                         |                                |   |
|------------------------------------------------------------|-----------------------------------|---|-------------------------|--------------------------------|---|
| AmphL6244- <i>trnS</i>                                     | ATGTTGCTACCRTRRYYNATTARAGTTC      | a | AmphH6217- <i>trnS</i>  | GAACTTTAATNARTTATGGTAGCAACAT   | a |
| AmphL7442- <i>nad5</i>                                     | TGTTTCTTTATTGGKAGTGC              | a | AmphH8842- <i>trnE</i>  | ATAACRYAAGCTTTTCATGC           | a |
| AmphL8307- <i>trnG</i>                                     | AGAYTTCCAMTCTRARGRTCC             | a | AmphH9081- <i>cob</i>   | ACATCWCGRCARATATGNGC           | a |
| AmphL8842- <i>trnE</i>                                     | GCATGAAAARCTTRYGTTAT              |   | AmphLAH9480- <i>cob</i> | CCTGTTGGATTATTKGCCCTGTTTGRGTAA | a |
| AmphLAL9412- <i>cob</i>                                    | GGGYTTCTCYGTTGATAATGCMACACTAACTCG | a | AmphH10129- <i>trnP</i> | TAARCTTTGGGAGTTTAAARYG         |   |
| AmphL10108- <i>trnP</i>                                    | CRTYTTAAACTCCCAAAGYTTA            |   | AmphH11475- <i>rrnL</i> | CATTTCTTAARYAACAGCTA           |   |
| AmphL10383- <i>rrnS</i>                                    | GTGCCAGCCGCCGCGGTTA               |   | AmphH12522- <i>trnL</i> | GCTTAGGCCTTWYGCAATAC           | a |
| AmphL11103- <i>trnV</i>                                    | TAAGCGTYTCTTTTACACGG              |   | AmphH13633- <i>trnM</i> | CTCATGGTAGAGGATGGATT           | a |
| AmphLAL11918- <i>rrnL</i>                                  | GACTGTGCAAAGGTAGCATAATCACTTGCCC   |   |                         |                                |   |
| AmphL13396- <i>nad1</i>                                    | TGRTTTCGKGCWTCNTACCC              | a |                         |                                |   |
| AmphL14219- <i>nad2</i>                                    | GGAGGNYTNGGNCARACRCAANTRCG        |   |                         |                                |   |
| AmphL14488- <i>trnN</i>                                    | CATCKTTGGATTAACAGTC               | a |                         |                                |   |
| AmphL14842- <i>trnW</i>                                    | AGACCTTTAGCCTTCAAAGCTG            |   |                         |                                |   |
| <i>PCR and sequencing primers (fish-versatile primers)</i> |                                   |   |                         |                                |   |
| L6631-COI (726)                                            | TGRTTTTTTGGTCACCCTGAAGT           | a | H7227-COI (1324)        | CATGTAGTGTATGCATCAGGGTARTC     | g |
| L6730-COI (805)                                            | TATATAGGAATRGTMGTGAGC             | b | H7892-COII (1996)       | TCGTAGCTTCAGTATCATTG           | a |
| L7255-COI (1352)                                           | GATGCCTACACMCTGTGAAA              | b | H8168-COII (2272)       | CCGCAGATTTTCWGAGCATTG          | b |
| L7905-COII (2009)                                          | GGCCAYCARTGGTAYTGAAG              | a | H8589-ATP6 (2767)       | AAGCTTAKTGTCATGGTCAGT          | b |
| L8343-Lys (2402)                                           | AGCGTTGGCCTTTTAAAGCTAAWGATWGGTG   | a | H9076-ATP6 (3144)       | GGGCGGATAAAKAGGCTAAT           | b |
| L8894-ATP6 (2879)                                          | TTGGACTACTWCCSTATAAC              | b | H10244-ND3 (4275)       | AGGAGSGCGATTTTCWAGRTC          | a |
| L9514-COIII (3599)                                         | TTCTGAGCCTTCTAYCA                 | b | H10433-Arg (4458)       | AACCATGGWTTTTTGAGCCGAAAT       | b |
| L11895-ND4 (5899)                                          | CCTAACCTWATGGGRRGAAGT             | b | H11618-ND4 (5622)       | TGGCTGACKGAKGAGTAGGC           | c |
| L13280-ND5 (6749)                                          | CAACTWGGKCTAATAATAGT              | a | H12145-His (6138)       | CTAGTGTTTTKGTTAAACTA           | b |
| L15927-Thr (10062)                                         | AGAGCGTCGGTCTTGTAACKCCG           | c | H12632-ND5 (6586)       | GATCAGGTTACGTAKAGKGC           | b |
| L1085-12S (10530)                                          | TAAACCAGGATTAGATACCC              | d | H14086-ND5 (7764)       | AGGSTKAGGTAKGTTTTRAT           | c |
| L1496i-12S (10909)                                         | GTACATATCGCCCGTCGCTT              | e | H1358-12S (10691)       | CGACGGCGGTATATAGGC             | b |
| L2188-16S (11601)                                          | AGTGGGCCTAAAAGCAGCCA              | a | H1478-12S (10842)       | GAGAGTGACGGGCGATGTGT           | d |
| L2510i-16S (11855)                                         | CGCCTGTTTAAACAAAACAT              | f | H1903-16S (11341)       | GTAGCTCGTYTAGTTTCGGG           | b |
| S-LA-16SL (12411)                                          | GATTAAAGTCCTACGTGATCTGAGTTCAG     | b | H2491c-16S (11836)      | ATGTCTTTGTTAAACAGGCG           | a |
| L3686-ND1 (12964)                                          | TGAGCMTCWAATTCMAAATA              | a | H2716i-16S (12051)      | AAGTTTTATAGGGTCTTATCGTC        | e |
| L4180-ND1 (13437)                                          | CAACTCATGCATTTTRGTWTGRAAAA        | c | H3466-ND1 (12744)       | ATKGGTCTTTTGATGAAKAGTTT        | c |
| L4438-Met (13618)                                          | AAGCTTTTGGCCCCATRCCC              | a | H3976-ND1 (13254)       | ATGTTGGCGTATTCKGCKAGGAA        | a |
|                                                            |                                   |   | H5622-Ala (14916)       | TTAATTAAGTGTCTGKKTGCA          | a |
|                                                            |                                   |   | H4557-ND2 (14752)       | GTATTAATTTCTAGKCCTATTCA        | a |

a, Nohara et al. (2005); b, Miya and Nishida (1999); c, Miya and Nishida (2000); d, Miya and Nishida (1998); e, Kitaura, Wada and Nishida (1998); f, Palumbi et al. (1991); g, Nishida, Ohkawa and Iwata (1998)

## References

- Kitaura J, Wada K, Nishida M: **Molecular phylogeny and evolution of unique mud-using territorial behavior in ocypodid crabs (Crustacea: Brachyura: Ocypodidae).** *Mol Biol Evol* 1998, **15**(6):626-637.
- Miya M, Nishida M: **Molecular phylogeny and evolution of the deep-sea fish genus *Sternoptyx*.** *Mol Phylogenet Evol* 1998, **10**(1):11-22.
- Miya M, Nishida M: **Organization of the mitochondrial genome of a deep-sea fish, *Gonostoma gracile* (Teleostei: Stomiiformes): First example of transfer RNA gene rearrangements in bony fishes.** *Mar Biotechnol* 1999, **1**(5):416-426.
- Miya M, Nishida M: **Use of mitogenomic information in teleostean molecular phylogenetics: A tree-based exploration under the maximum-parsimony optimality criterion.** *Mol Phylogenet Evol* 2000, **17**(3):437-455.
- Nishida M, Ohkawa T, Iwata Y: **Methods of analysis of genetic population structure with mitochondrial DNA markers.** *Fish Genet Breed Sci* 1998, **26**:81–100. (in Japanese)
- Nohara M, Nishida M, Miya M, Nishikawa T: **Evolution of the mitochondrial genome in Cephalochordata as inferred from complete nucleotide sequences from two *Epigonichthys* species.** *J Mol Evol* 2005, **60**:526–537.
- Palumbi SR, Martin A, Romano S, McMillan WO, Stice L, Grabowski G: **The simple fool's guide to PCR. ver. 2.** Honolulu: University of Hawaii Press; 1991.
